# Supplementary material for: SARS-CoV-2 Vaccine Responses in Individuals with Antibody Deficiency: Findings from the COV-AD Study
Source: Springer Nature journal article supplement (doi:10.1007/s10875-022-01231-7), 2022-04-14

# Supplementary Figure 1: Correlates of magnitude of vaccine response

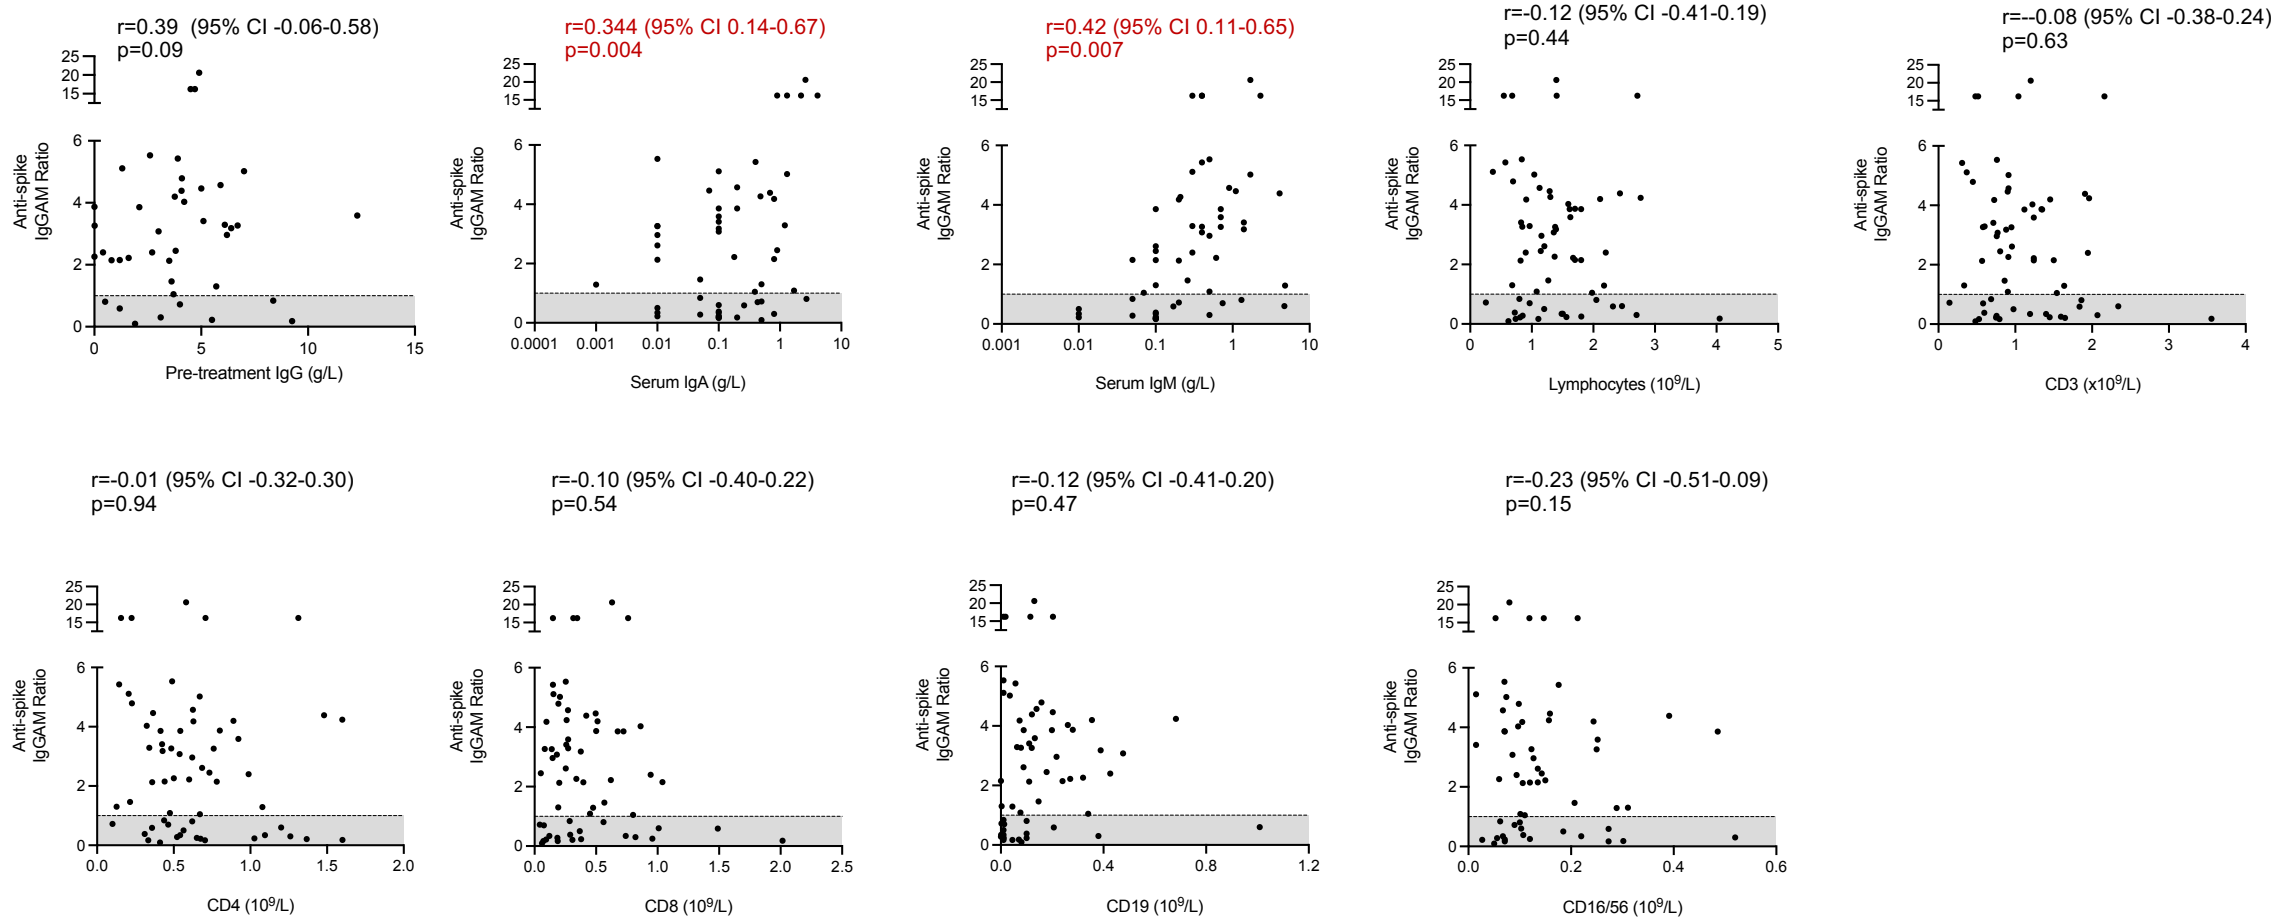



Supplementary Figure 3: Correlation between IgGAM levels and neutralization response

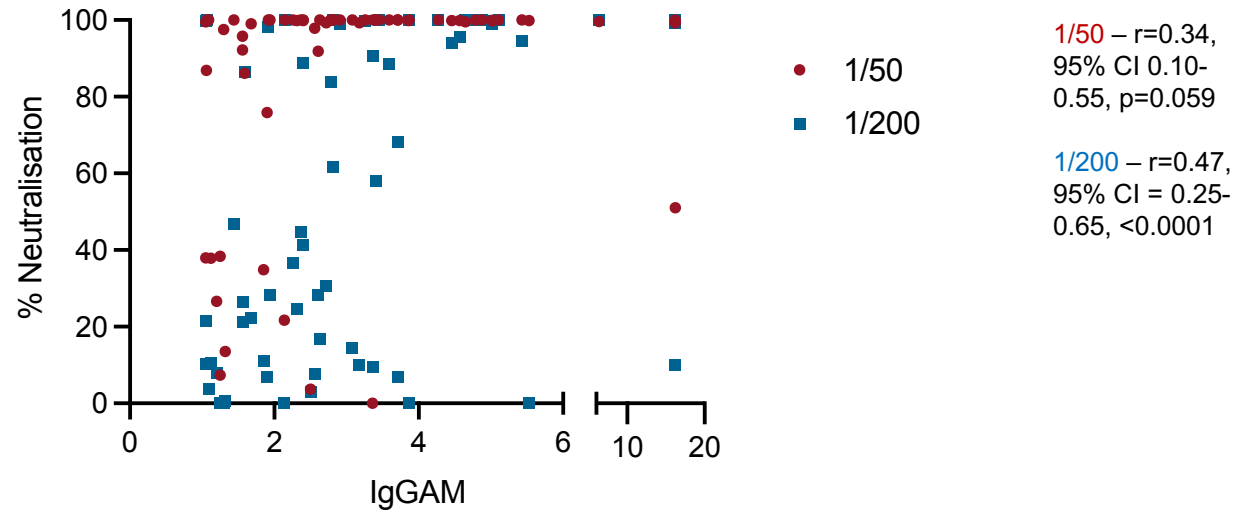

Supplement: MOESM2 [file 20312840]
